# Supplementary figures and images for: Selenocyanate derived Se-incorporation into the nitrogenase Fe protein cluster
Source: eLife journal article supplement (doi:10.7554/elife.79311), 2022-07-29

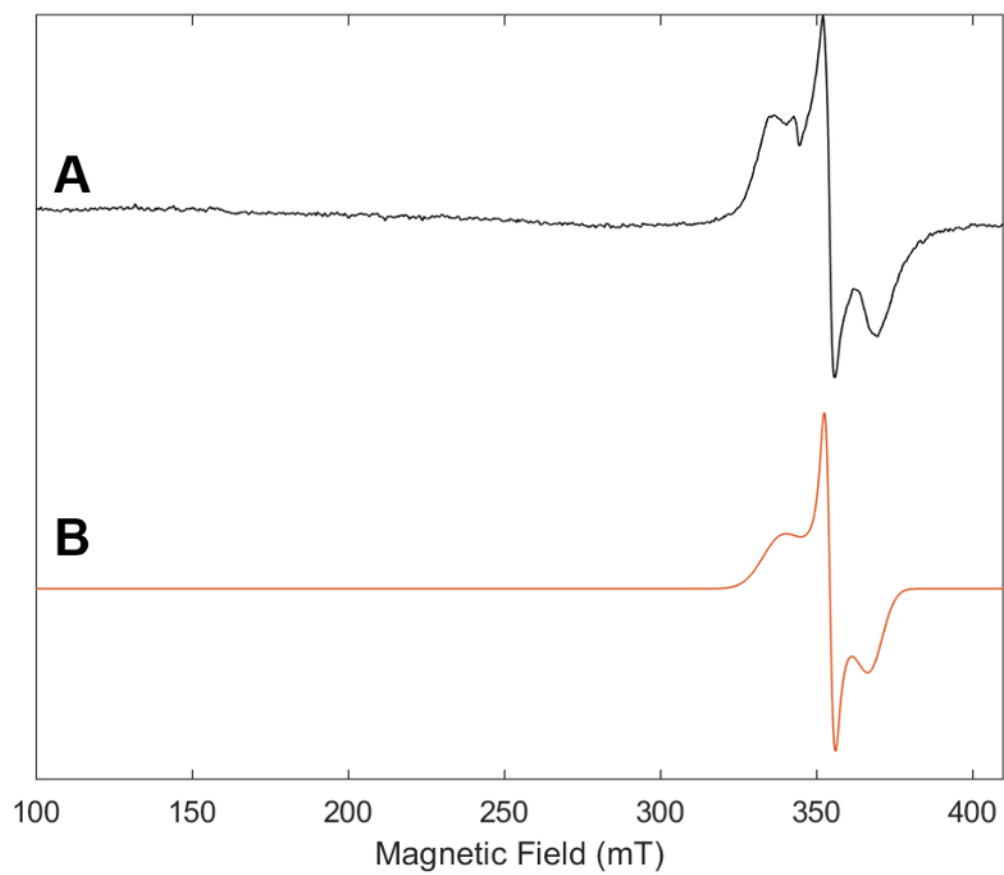

Supplement: supp [file elife-79311-supp-v1.zip]

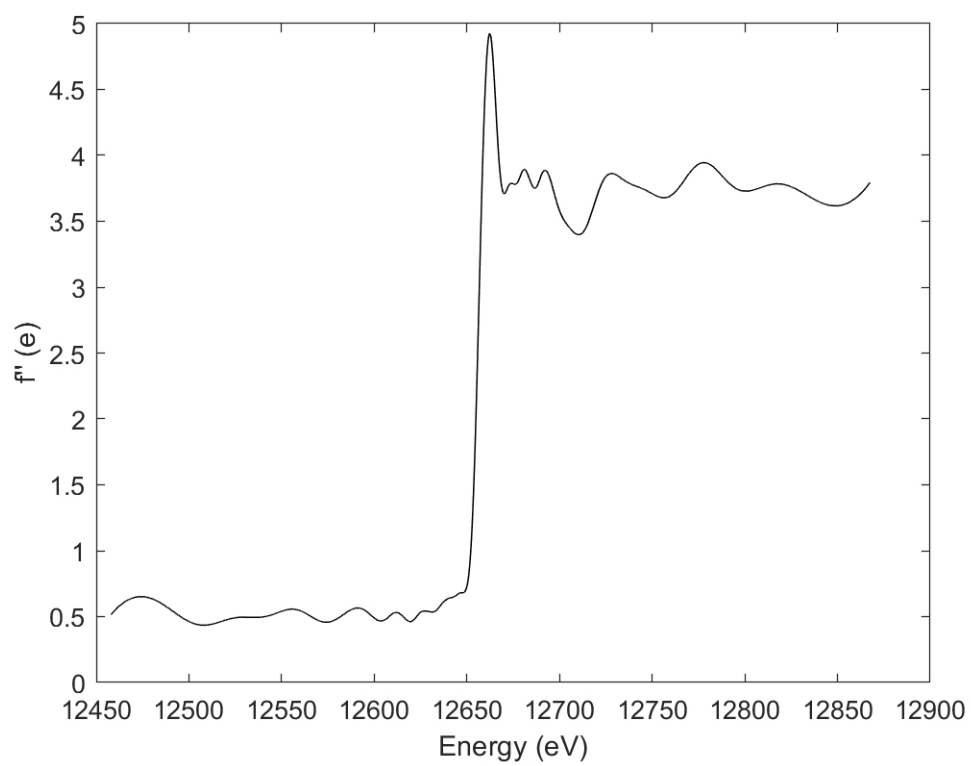

Supplement: supp [file elife-79311-supp-v1.zip]

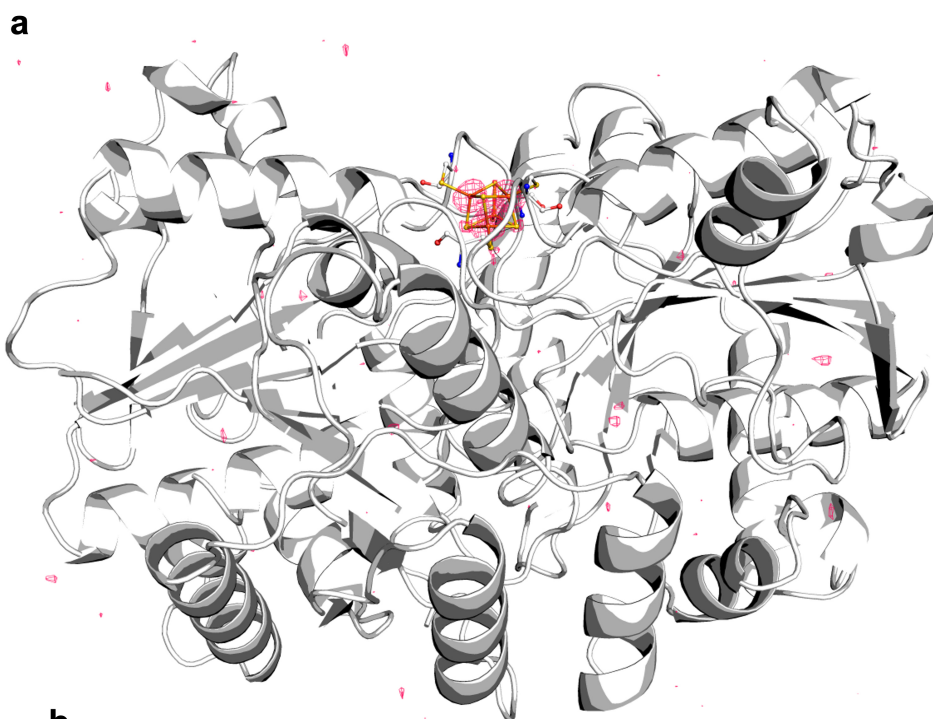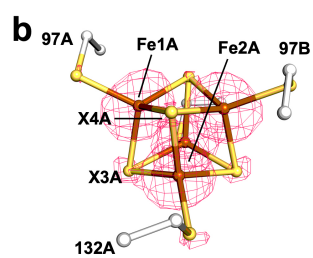

Supplement: supp [file elife-79311-supp-v1.zip]

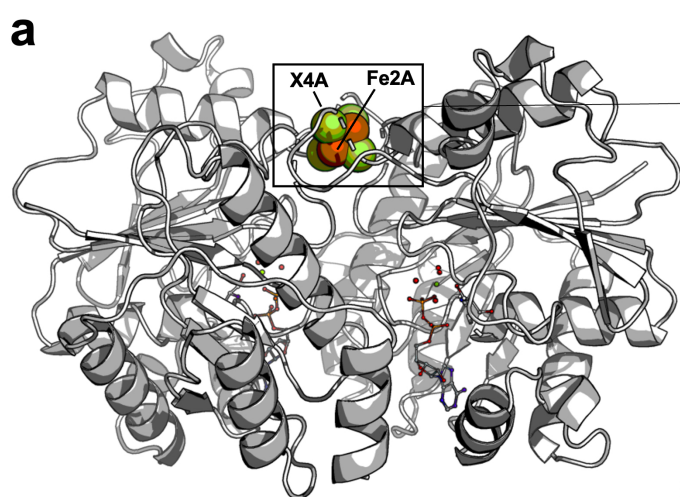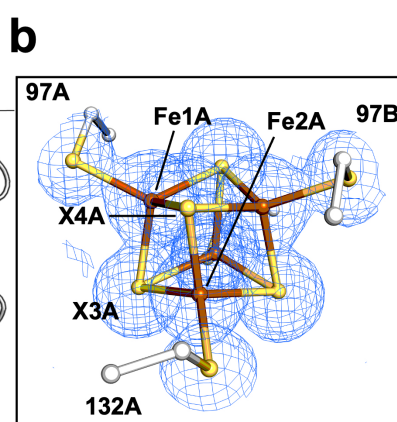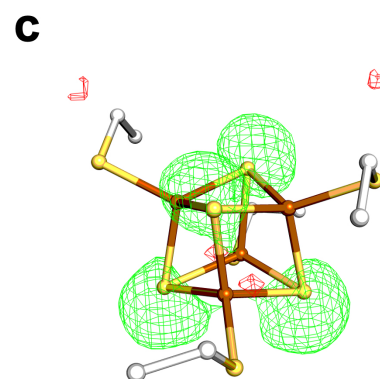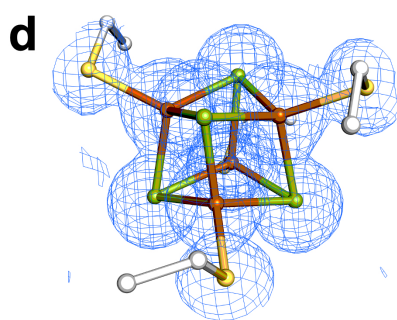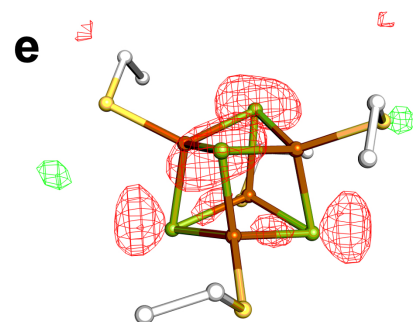

Supplement: supp [file elife-79311-supp-v1.zip]

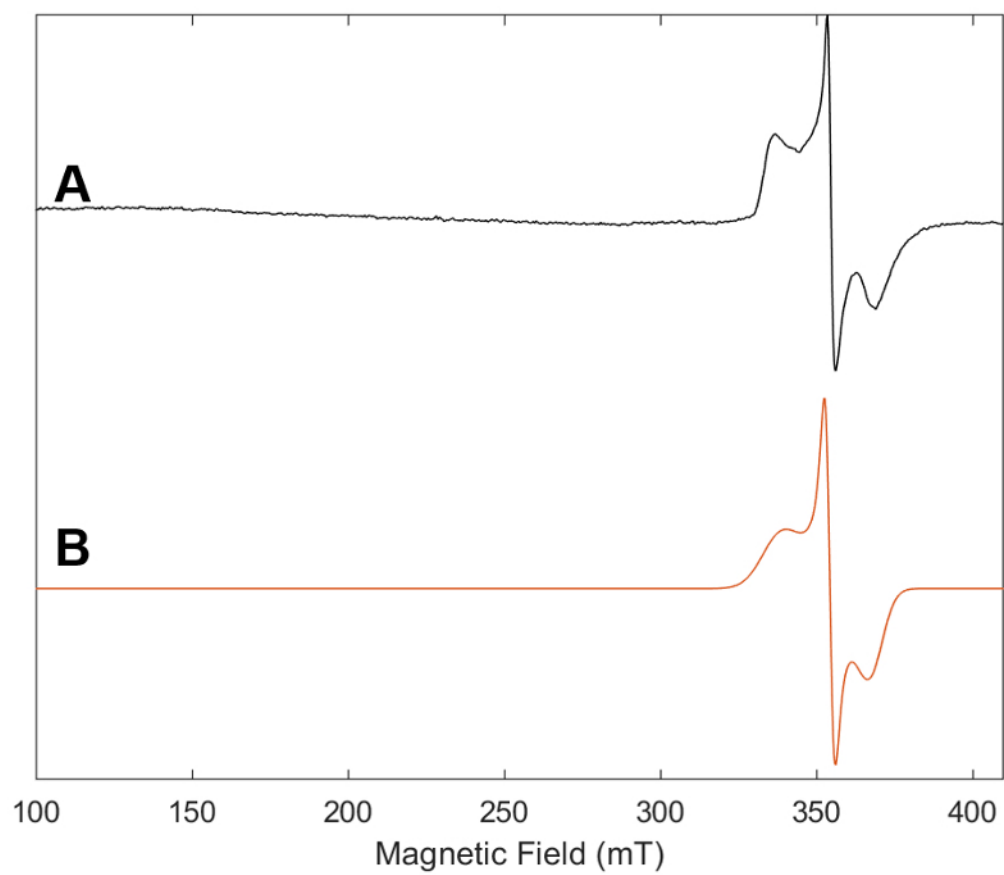

Supplement: supp [file elife-79311-supp-v1.zip]

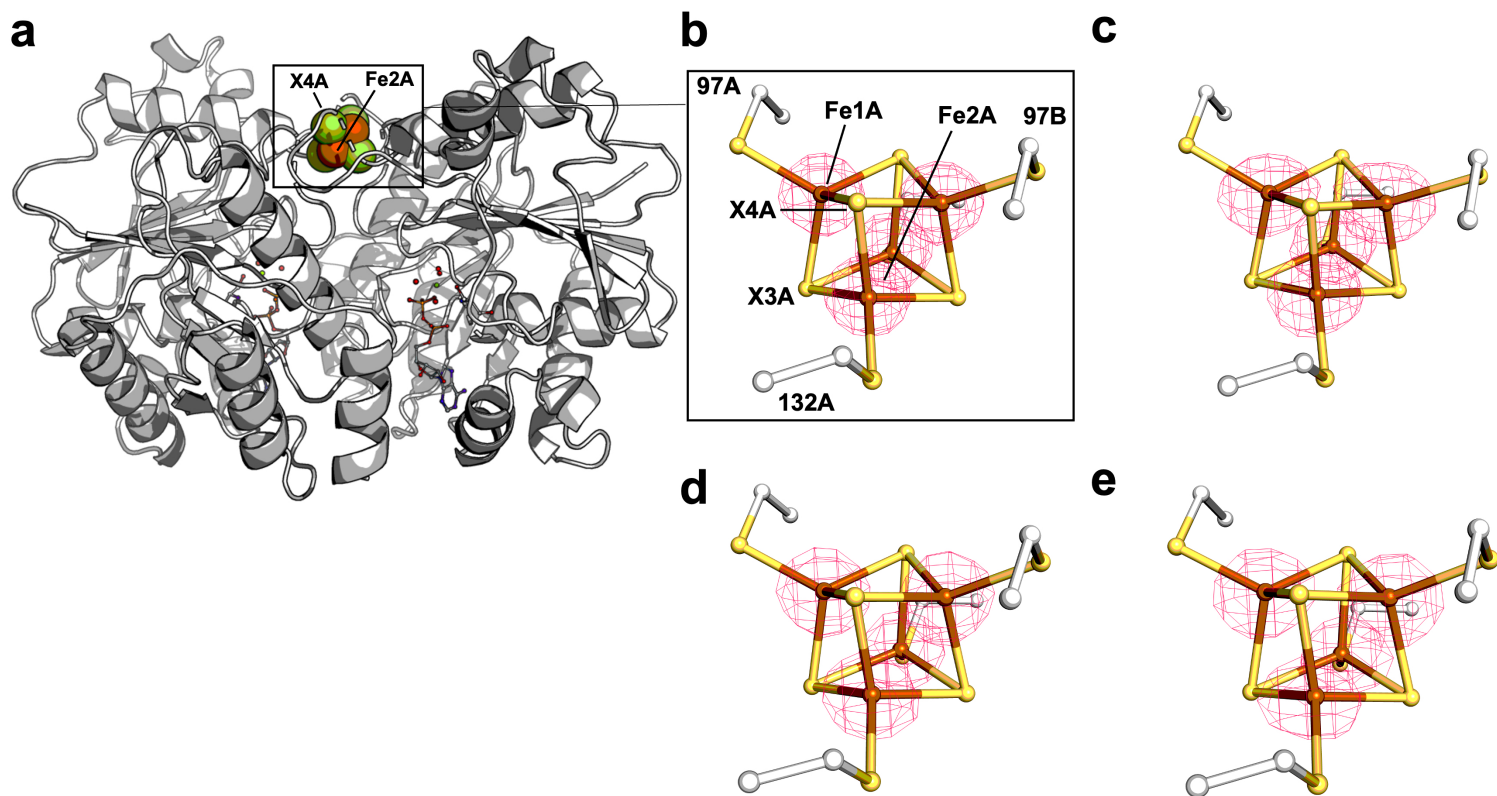

Supplement: supp [file elife-79311-supp-v1.zip]

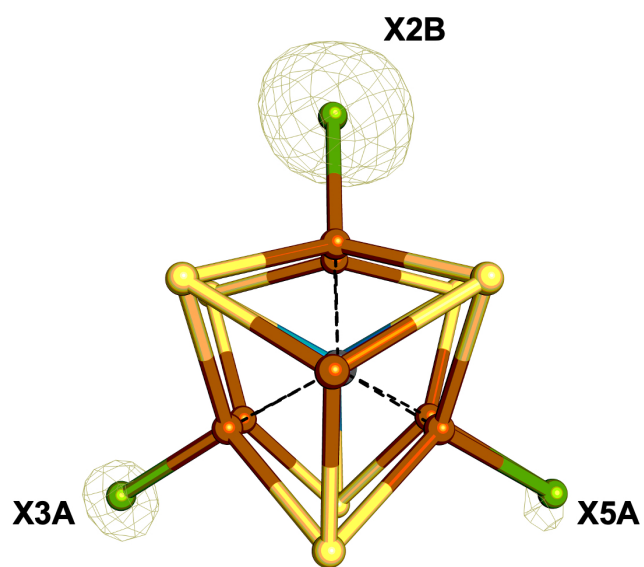

Supplement: supp [file elife-79311-supp-v1.zip]
